# Supplementary material for: Plasma surface-modification of cellulose nanocrystals: a green alternative towards mechanical reinforcement of ABS
Source: Royal Society of Chemistry journal article supplement (doi:10.1039/c9ra02451d), 2019-01-01
Supplement: c9ra02451d1.pdf [file c9ra02451d1.pdf]

## Supporting Information

### **Plasma surface-modification of cellulose nanocrystals: A green Alternative towards mechanical reinforcements of ABS**

Andrés Alanís<sup>a</sup>, Josué Hernández Valdés<sup>a</sup>, Neira-Velázquez María Guadalupe<sup>a</sup>, Ricardo Lopez<sup>a</sup>,  
Ricardo Mendoza<sup>a</sup>, Aji P. Mathew<sup>b</sup>, Ramón Díaz de León<sup>a\*</sup> and Luis Valencia<sup>b\*</sup>

<sup>a</sup>*Research Center for Applied Chemistry, Blvd Enrique Reyna 140, 25253, Saltillo, Mexico*

<sup>b</sup>*Division of Materials and Environmental Chemistry, Stockholm University, Frescativägen 8,  
10691, Stockholm, Sweden*

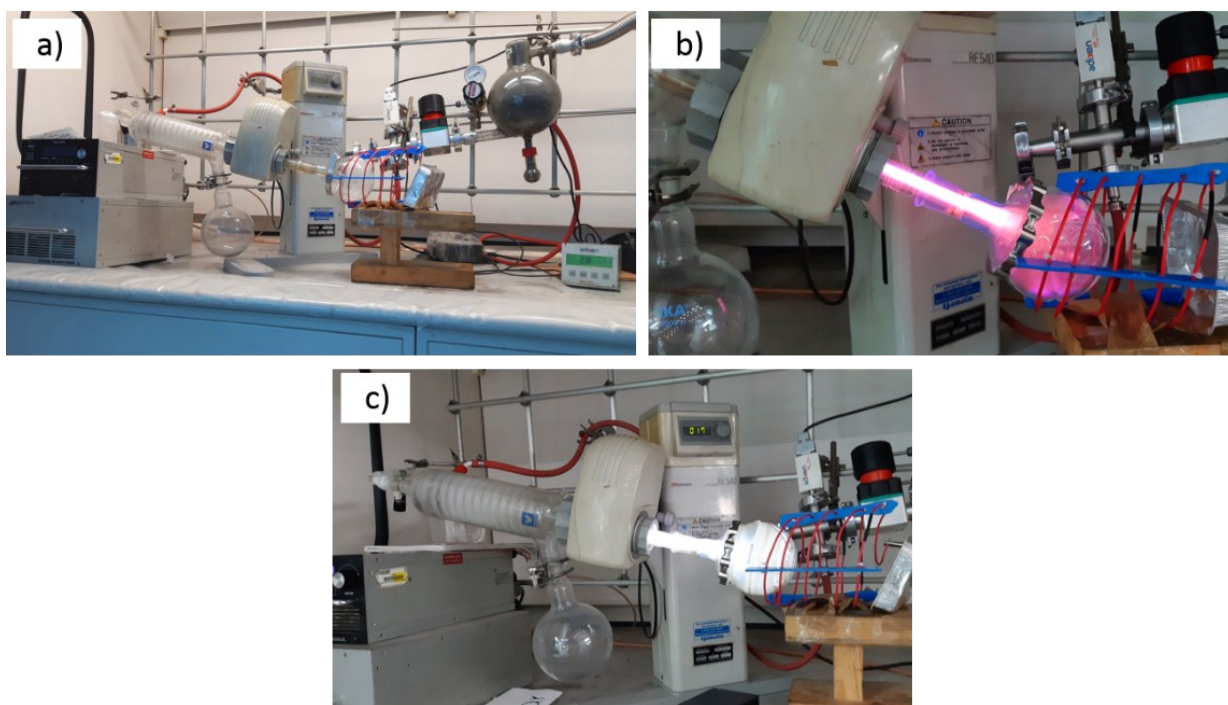

**Figure S1.** Photograph of the plasma reactor employed for the modification of the nanocrystals. A) Reactor before modification, B) Reaction test using an empty flask and air, C) Modification of CNC's using Caprolactone.

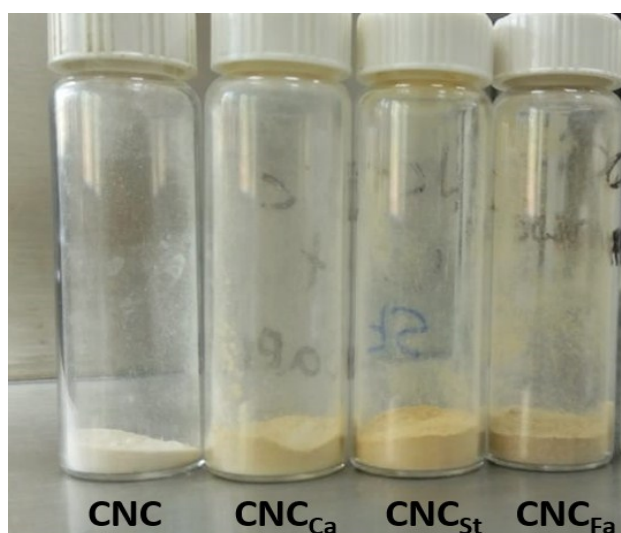

**Figure S2.** Photograph of cellulose nanocrystals before and after modification

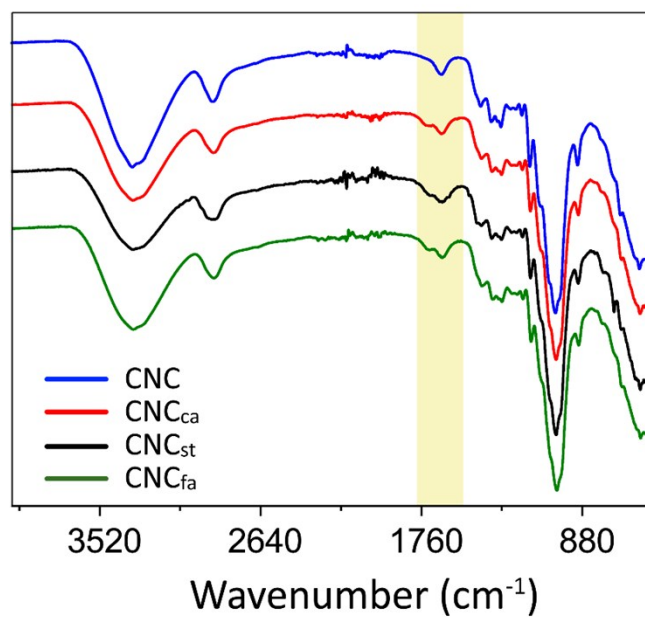

**Figure S3.** FTIR spectra of cellulose nanocrystals before and after plasma modification

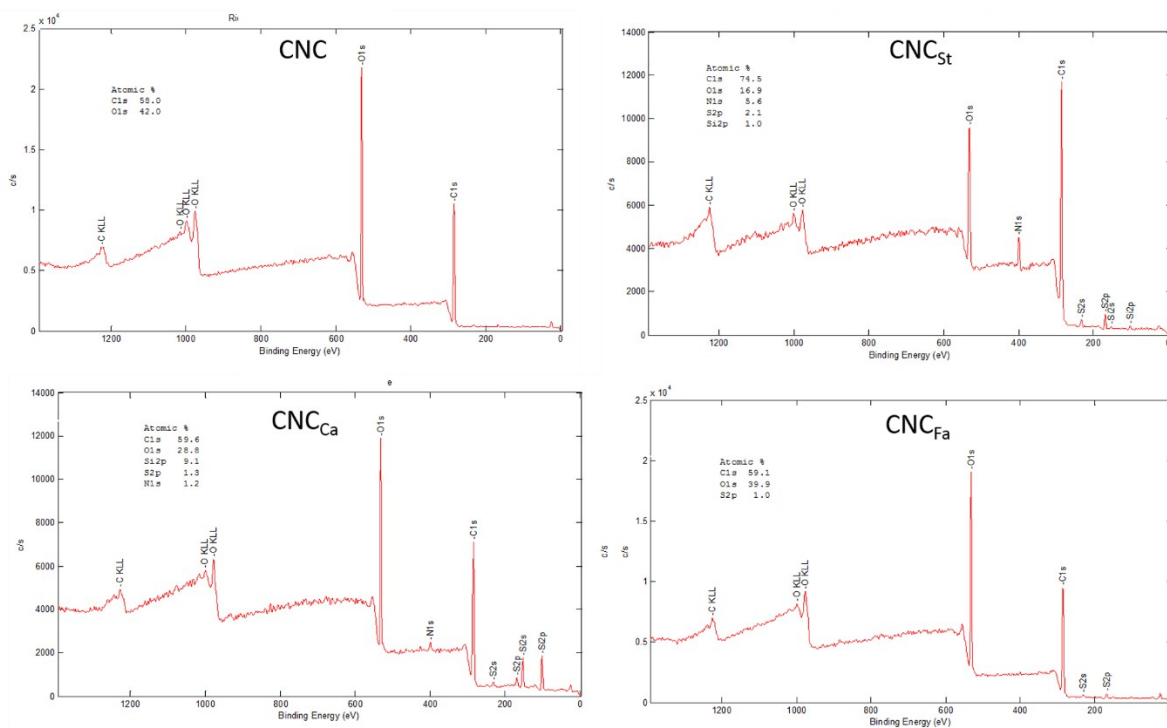

**Figure S5.** XPS survey of cellulose nanocrystals before and after modification

**Table S1.** Atomic composition of nanocrystals calculated from XPS

| <i>Sample</i>           | <i>Atomic ratio (%)</i> |      |      |
|-------------------------|-------------------------|------|------|
|                         | % C                     | % O  | C/O  |
| <i>CNC</i>              | 58.0                    | 42.0 | 1.38 |
| <i>CNC<sub>St</sub></i> | 74.5                    | 16.9 | 4.40 |
| <i>CNC<sub>Ca</sub></i> | 59.6                    | 28.8 | 2.06 |
| <i>CNC<sub>Fa</sub></i> | 82.6                    | 14.9 | 5.54 |

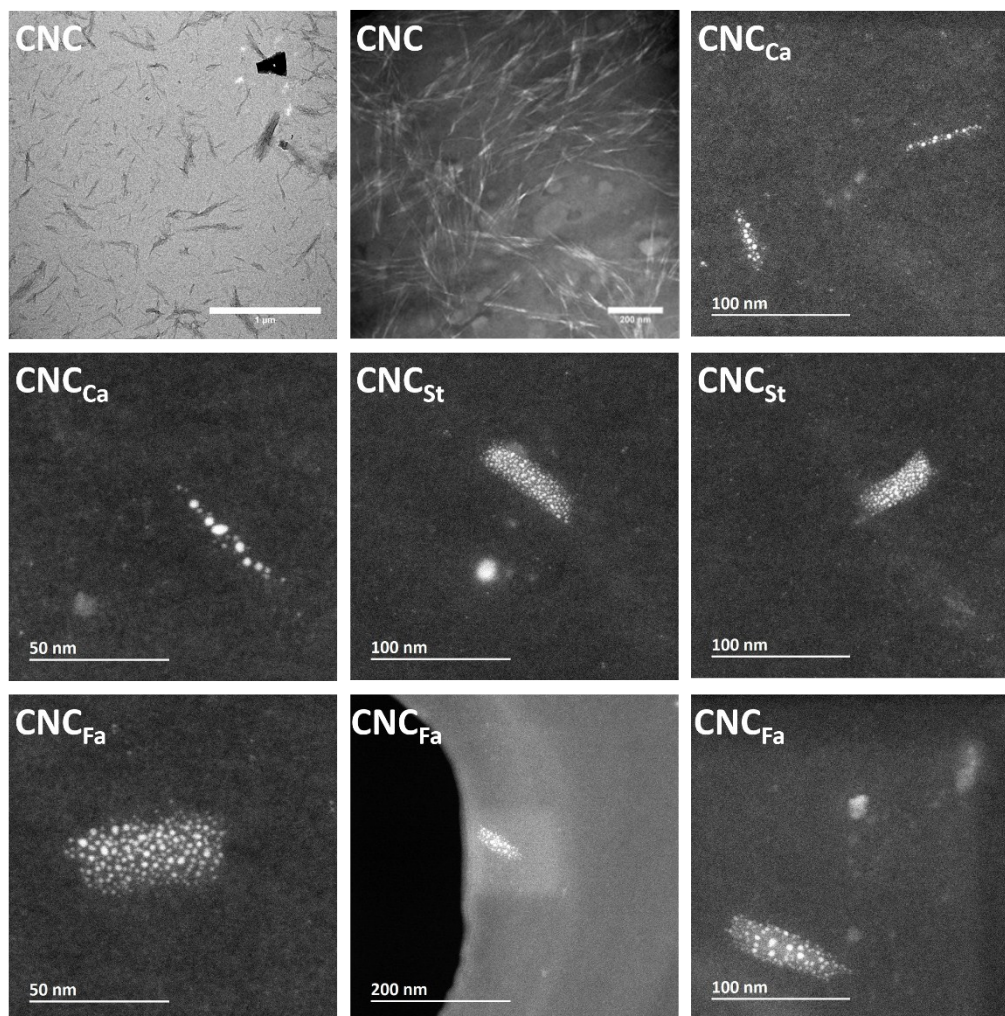

**Figure S4.** STEM micrographs of the cellulose nanocrystals before and after plasma modification

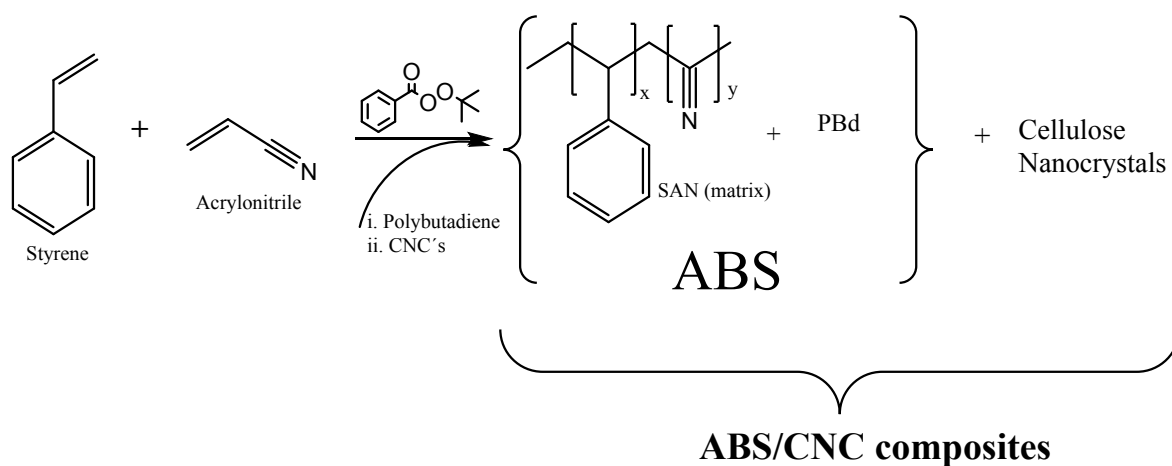

**Scheme S1.** Reaction diagram for the synthesis of ABS/CNC composites

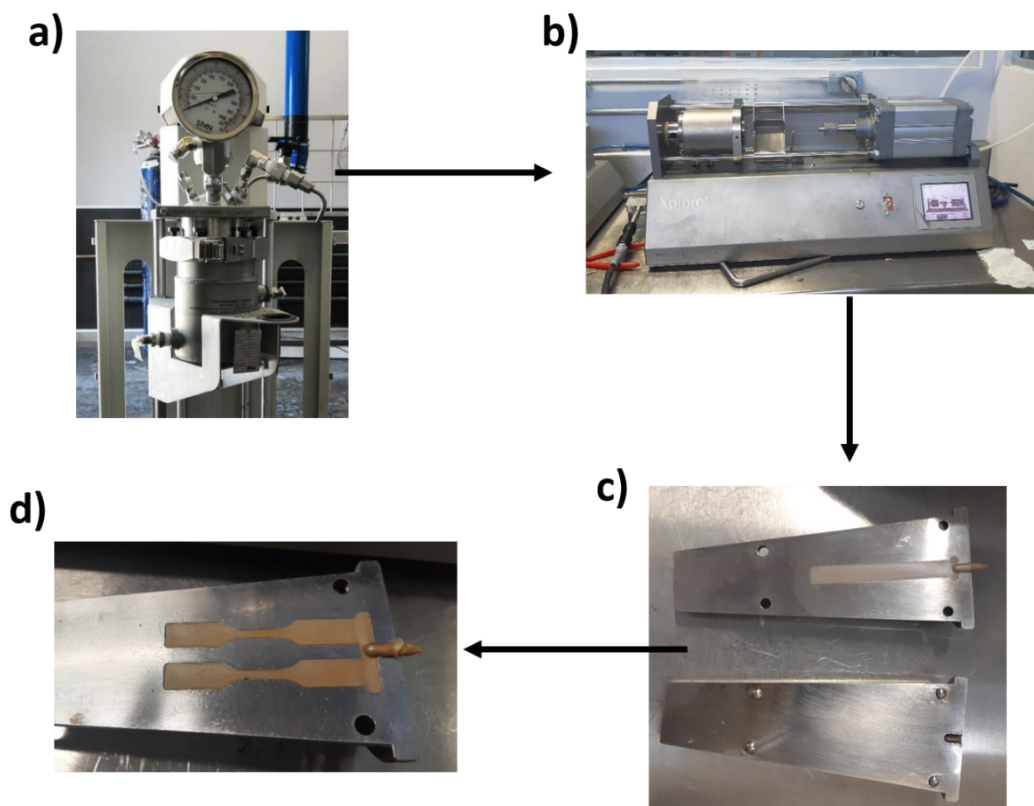

**Figure S6.** Schematic diagram of production of ABS/Nanocomposites: a) Stainless steel reactor (1 L capacity), equipped with an anchor-turbine stirrer used for the polymerization of ABS Nanocomposites; b) Xplore micro-injection moulder; c) Moulded sample of ABS/CNC; d) Moulded sample of ABS/CNC-g-Ca

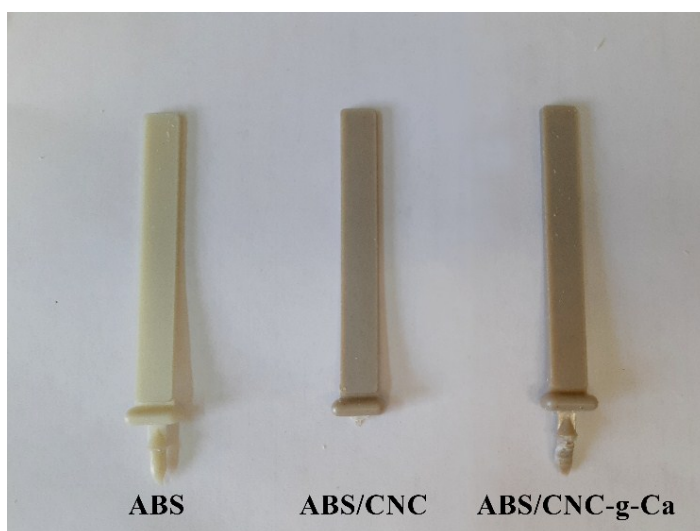

**Figure S7.** Injecton molded ABS samples with and without loading of cellulose nanocrystals

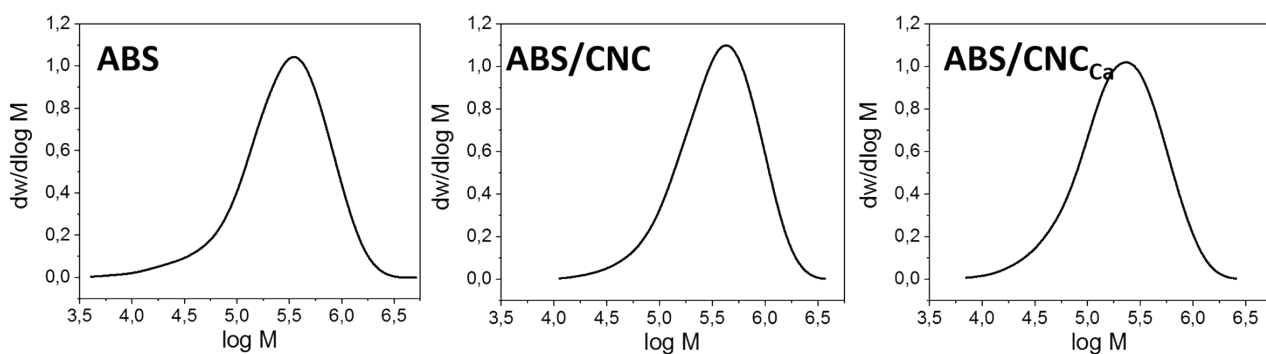

**Figure S8.** Size distribution of the different SAN copolymers in the synthesis of ABS/CNC nanocomposites

**Table S2.** Molecular weight characteristics of the SAN copolymers in the synthesis of ABS/CNC nanocomposites

| Sample                | Mp (gmol <sup>-1</sup> )<br>10 <sup>-4</sup> | Mn (gmol <sup>-1</sup> )<br>10 <sup>-4</sup> | Mw (gmol <sup>-1</sup> )<br>10 <sup>-4</sup> | Mz (gmol <sup>-1</sup> )<br>10 <sup>-4</sup> | PD   |
|-----------------------|----------------------------------------------|----------------------------------------------|----------------------------------------------|----------------------------------------------|------|
| ABS                   | 34.61                                        | 15.16                                        | 41.31                                        | 73.99                                        | 2.72 |
| ABS/CNC               | 43.07                                        | 22.46                                        | 48.39                                        | 81.12                                        | 2.15 |
| ABS/CNC <sub>Ca</sub> | 23.18                                        | 12.60                                        | 29.27                                        | 53.35                                        | 2.32 |
